# Supplementary material for: Divergent mechanisms underlie Smad4-mediated positive regulation of the three genes encoding the basement membrane component laminin-332 (laminin-5)
Source: PubMed Central journal article supplement (PMC2525660; doi:10.1186/1471-2407-8-215), 2008-07-29
Supplement: 1471-2407-8-215-S1.pdf [file 1471-2407-8-215-S1.pdf]

| <b>vector construction</b> |                                               |                         |
|----------------------------|-----------------------------------------------|-------------------------|
| LAMA3 3' BglII -24         | AGTAGATCTGCAGGAACCTCTGCCTCTTC                 |                         |
| LAMA3 5' NheI -2025        | GATGCTAGCCGTTTGTGCAAGAAAAGATTG                |                         |
| LAMA3 5'Kpn-3.8kb          | GTAAGTCTGACCTCTGGAAATGGCACACAATG              | Fig. 2, 3               |
| LAMB3 3' -4 XhoI           | GATCTCGAGTCTTGAATGTGGGGGTCTC                  |                         |
| LAMB3 3' -1947 Nhe         | AGACTGCTAGCTTTATGCAGACCCCCAAGAG               |                         |
| LAMB3 5'-3887_Kpn          | AGTCAGGTACCAAGCTGCATGCACAGTTGTC               | Fig. 2, 4, 5            |
| LAMC2 3'-11_Hind           | CAGTCAAGCTTCCTTGATCAGGTGGTTTTATCG             |                         |
| LAMC2 5' -2018 Xho         | ACAGTCTCGAGTCACTGTCCCAAATGATGC                |                         |
| LAMC2 5'-4034_Xho          | ACTGACTCGAGCCACTGATCTGCTTTCTTGC               | Fig. 2, 4, 6            |
| <b>mutagenesis</b>         |                                               |                         |
| lama3_mut_sbe              | CGCACATCTGCCAGTGTGACAGCACTGTCATCAGC           |                         |
| LAMA3_MUT_SBE              | GCTGATGACAGTGCTGTCAACACTGGCAGATGTGCG          | Fig 3b,d                |
| MUT_AP1_A                  | GACAGCCTTCCACCTGGATCCGGCAGGCCCGGGCACTG        |                         |
| mut_ap1_a                  | CAGTGCCCGGGCCTGCCGGATCCAGGTGAGGAAGGCTGTC      |                         |
| MUT_AP1_B                  | GCGCTCTGGCACAGGCTGGATCCTGTGTGAAGTTAAAGGTG     |                         |
| mut_ap1_b                  | CACCTTTAAACTTCACACAGGATCCAGCCTGTGCCAGAGCGC    |                         |
| MUT_AP1_C                  | CGTGTTCCCTGCCCGTGGATCCGCTGTGATTTAGGGC         |                         |
| mut_ap1_c                  | GCCCTAAATCACAGGCGGATCCACGGGCAGGGAACACG        | Fig. 3c,d               |
| LAMA3-mSP1_S               | GGTGGGTGGAAGGTGATGCATGCATCACCTCACAGGAATTACAG  |                         |
| LAMA3-mSP1_AS              | CTGTAATTCCTGTGAGGTGATGCATGCATCACCTCCACCCACC   | data not shown          |
| lamb3_mAP1_0,7k_S          | GTAGCTGCCTGTGAGCTCCTCCACCTGTG                 |                         |
| LAMB3_mAP1_0,7k_AS         | CACAGGTGGGAGGAGCTCACAGGCAGCTAC                | Fig. 5b,d,f             |
| lamb3_mut_ap1              | GGAAGGGGCACCAGGGAGCTCAAGCTCAGGCC              |                         |
| LAMB3_MUT_AP1              | GGCCTGAGCTTGAGCTCCCTGGTCCCCCTTCC              | Fig. 5c,d,f             |
| lamb3_mut_sbe              | GATAGTCCAATAAATGTTAGGATCGTGCCCCCTGTAAGCATTCC  |                         |
| LAMB3_MUT_SBE              | GGAATGCTTACAGGGGGCAGATCCTAACATTTATTGGACTATC   |                         |
| LAMB3-MUT-2.7SBE           | CTTTGTAGATATCCAGGGGCTAGCCCGTTCCAGGCAGCAGAAG   |                         |
| lamb3-mut-2.7sbe           | CTTCTGCTGCCTGGAACGGGCTAGCCCGTGGATATCTACAAAG   |                         |
| LAMB3-MUT-3.7SBE           | GAGAAGAGTGTGACCAGTTCTCCGGACAGCTGAGCAGTTGTG    |                         |
| lamb3-mut-3.7sbe           | CACAAGTGTGCTGCTGCTCCGGAGAAGTGGTACACTCTTCTC    | Fig. 4                  |
| LAMB3_mSP1_S               | GCCAGATTCCTGAGACGAGCTCTGCGGTGGGGCTACAC        |                         |
| lamb3_mSP1_AS              | GTGTAGCCCCACCGCAGAGCTCGTCTCAGGAATCTGGC        | Fig. 5e,f               |
| lamc2_mut_ap1b             | GAGCCTGTGTTTCAGGGTGGAGCTCACCTGTGAATAAGGAG     |                         |
| LAMC2_MUT_AP1B             | CTCCTTATTCACAGGTGAGCTCCACCCTGAAACACAGGCTC     | Fig. 6c,d,f             |
| lamc2_mut_ap1a             | GTTTTATCGACTCTTCTACCGAGCTCAGTCCCTGACAGGAAGAG  |                         |
| LAMC2_MUT_AP1A             | CTCTTCTGTGCTGAGGACTGAGCTCGGTAGAAGATCGATAAAAAC | Fig. 6b,d,f             |
| LAMC2-MUT-1.6SBE           | CCAGTTTGCAGCAACCTGTGGTACCCCTACCATTCTTGGGTTC   |                         |
| lamc2-mut-1.6sbe           | GAACCCAAGAATGGTAGGGGTACCACAGGTTGCTGCAAAGTGG   |                         |
| LAMC2-MUT-2.7SBE           | GGGGCGTCAAGCCTGAGCTAGCCAGTTGTTTGGATGTGTG      |                         |
| lamc2-mut-2.7sbe           | CACACATCCAAACAAGTGGCTAGCTCAGGCTTGCAGCCCC      | Fig. 4                  |
| LAMC2-mSP1_S               | GGCCTCCCAGTTTGAAGAGATGCATGCTGCTGTCTACCTCTGTG  |                         |
| LAMC2-mSP1_AS              | CACAGAGGTAGACAGCAGCATGCATCTTCTCAAAGTGGGAGGCC  | Fig. 6e, f              |
| <b>chromatin-IP</b>        |                                               |                         |
| LAMA3-CHIP                 | GTGTAGGGAACTTCAGACATGC                        |                         |
| lama3-chip                 | ACTTCCTACCTGACAAGAGTCACC                      | -1,4/-1.6kb (SBE-site)  |
| LAMA3 A-S                  | GAGGAAGAGGCAGAGGTTCC                          |                         |
| lama3 a-as                 | TCCACATAACTCGCTTGCGAG                         | -0.1/-0.3kb (AP1-sites) |
| LAMA3 E-S                  | ACCCTTCAGCCCTCTTGG                            |                         |
| lama3 e- as                | GACATTTGGTTGCTTCTTGG                          | -2.5/-2.7kb (control)   |
| LAMB3_CHIP-2.4kb           | AAAGGGGTGTGGTACTGTGG                          |                         |
| LAMB3-4kb-seqC             | CAGACGTCCCAGGAAAAGAG                          | -2.2/-2.4kb (control)   |
| LAMB3_CHIP-3.5kb           | GCCTGCTTCTCAGTCATTCC                          |                         |
| LAMB3-4kb-seqA             | TGGACCAGGTTCTCCTATGC                          | -3.3/-3.5kb (AP1-site)  |
| bLAMB3-590as               | AAAAGGCAAGGTTTCATCAGG                         |                         |
| BLAMB3-856S                | ATGCTTCAGCCTTTCTTCC                           | -0.6/-0.8kb (AP1-site)  |
| CLAMC2-340S                | GGCTGCTGTCTACCTCTGTG                          |                         |
| clamc2-69as                | CCTGTGTTTTAGGGTGTGAC                          | -0.1/-0.3kb (AP1-site)  |
| CLAMC2-1683S               | GCCTTGGATGAGAAAGTTGG                          |                         |
| clamc2-1457as              | TCATGCATGTCATGGAGACC                          | -1.5/-1.7kb (control)   |

**AP1-probes**

|         |                      |
|---------|----------------------|
| cJun_S  | ACAGAGCATGACCCTGAACC |
| cJun_AS | GTGTTCTGGCTGTGCAGTTC |
| JunD_S  | GTGCCCAGGAACTCAGAGAG |
| JunD_AS | ACACACACACACAACCAACG |
| JunB_S  | CGGCAGCTACTTTTCTGGTC |
| JunB_AS | TGCTGAGGTTGGTGTAACG  |
| Fra2_S  | TTGTCCAGAAGGGGACAAAG |
| Fra2_AS | CAGGAGACGCCCTACTCAAG |
| cFos_S  | CCGGGGATAGCCTCTCTTAC |
| cFos_AS | CCCTTCGGATTCTCCTTTTC |
| FosB_S  | TCTTCCTCCCCTCAACAGTG |
| FosB_AS | AGAGCCAAAACCATGGTCAG |
| Fra1_S  | CATCGCAAGAGTAGCAGCAG |
| Fra1_AS | GGCCAGCTCAAGAGAAACAG |
